# Supplementary material
Source: PubMed Central journal article supplement (PMC3089503)
Supplement: supp_M111.227611_jbc.M111.227611-1.pdf [file supp_M111.227611_jbc.M111.227611-1.pdf]

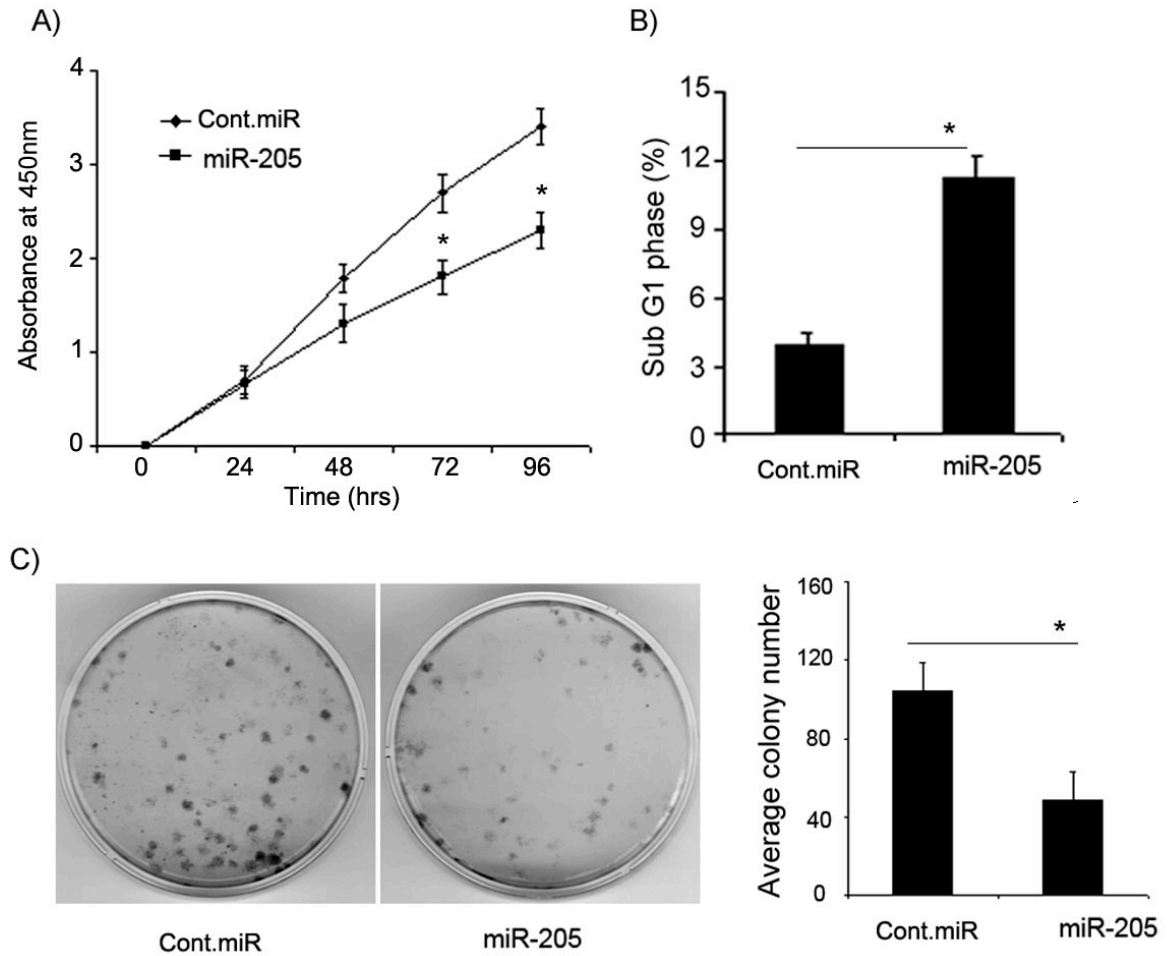

Supplemental Fig 1

Supplemental Figure 1: miR-205 inhibits melanoma cell proliferation and colony formation in Lox human melanoma cells.

A) Proliferation of Lox cells is significantly suppressed following miR-205 transfection. B) Significant increase in the sub-G1 phase of Lox cells following miR-205 transfection. C) miR-205 significantly reduced the colony formation ability of Lox cells. \* $p < 0.05$
